# Supplementary material
Source: PubMed Central journal article supplement (PMC3964733)
Supplement: ac500168d_si_001.pdf [file ac500168d_si_001.pdf]

# Patch clamp electrophysiology and capillary electrophoresis–mass spectrometry metabolomics for single cell characterization

Jordan T. Aerts,<sup>1,5</sup> Kathleen R. Louis,<sup>2,3,#</sup> Shane R. Crandall,<sup>2,3</sup> Gubbi Govindaiah,<sup>2,3</sup> Charles L. Cox,<sup>1,2,3,5,#</sup>  
and Jonathan V. Sweedler<sup>1,3,4,5,\*</sup>

<sup>1</sup>Beckman Institute for Advanced Science and Technology, <sup>2</sup>Department of Pharmacology, <sup>3</sup>Department of Molecular and Integrative Physiology, <sup>4</sup>Department of Chemistry, <sup>5</sup>Neuroscience Program  
University of Illinois at Urbana-Champaign, Urbana, IL 61801, United States

#Current Address: Department of Physiology, Michigan State University, East Lansing, MI 48824

## **SUPPORTING INFORMATION**

### **Tables S1 and S2**

**Table S-1.** Comparison of metabolites detected from microdissected nuclei versus cytoplasm.

| Metabolite ID                  | Slice sections | Cytoplasm |
|--------------------------------|----------------|-----------|
| spermine                       | +              | +         |
| spermidine                     | +              | +         |
| putrescine                     | +              | +         |
| histamine                      | +              | +         |
| agmatine                       | –              | +         |
| methyl-lysine                  | +              | +         |
| choline                        | +              | +         |
| homocarnosine                  | +              | -         |
| creatinine                     | +              | +         |
| ornithine                      | +              | +         |
| b-alanine                      | +              | +         |
| lysine                         | +              | +         |
| niacinamide                    | +              | +         |
| adenine                        | –              | +         |
| arginine                       | +              | +         |
| acetylcholine                  | +              | –         |
| GABA                           | +              | +         |
| histidine                      | +              | +         |
| 6-aminocaproic acid            | –              | +         |
| carnitine                      | +              | +         |
| guanine                        | –              | +         |
| pyridoxine                     | +              | –         |
| serotonin                      | +              | –         |
| synephrine                     | +              | –         |
| norepinephrine                 | +              | –         |
| 5-MEODMT                       | +              | –         |
| glycine                        | +              | +         |
| creatine                       | +              | +         |
| alanine alanine                | +              | +         |
| cytidine                       | +              | –         |
| adenosine                      | +              | +         |
| alanine                        | +              | +         |
| argininosuccinic acid          | +              | –         |
| $\alpha$ -aminoisobutyric acid | +              | –         |
| sarcosine                      | –              | +         |
| valine                         | +              | +         |
| threonine                      | +              | +         |
| serine                         | +              | +         |
| leucine                        | +              | +         |
| isoleucine                     | +              | +         |
| cystathionine                  | +              | +         |
| asparagine                     | +              | +         |
| tryptophan                     | +              | +         |
| methionine                     | +              | +         |
| glutamine                      | +              | +         |
| citrulline                     | +              | +         |
| glutamate                      | +              | +         |
| phenylalanine                  | +              | +         |
| tyrosine                       | +              | +         |
| hypoxanthine                   | +              | +         |
| proline                        | +              | +         |
| dimethylglycine                | +              | +         |

|                            |   |   |
|----------------------------|---|---|
| cysteine                   | + | - |
| aspartic acid              | + | + |
| betaine                    | + | + |
| proline betaine            | - | + |
| 4-hydroxyproline           | + | - |
| inosine                    | + | - |
| o-phosphoryl ethanolamine  | + | - |
| adenosine 5' monophosphate | + | - |
| cytidine 5' monophosphate  | + | + |
| phosphocholine             | + | - |
| taurine                    | + | - |
| glutathione                | + | + |
| cAMP                       | + | - |

Comparison of the identified metabolites that were detected from nuclei dissected from one of the 280- $\mu\text{m}$ -thick thalamus sections used for the electrophysiology experiments versus those that were not detected. The nuclei and white matter tract analyzed were the ventral basal nucleus, the thalamic reticular nucleus and the internal capsule, respectively. The cytoplasm samples span all cell types used in this study. Detected (+); not detected (-).

**Table S-2.** Identified metabolites from all cytoplasm samples.

| metabolite ID             | n= | %  |
|---------------------------|----|----|
| spermine                  | 14 | 47 |
| spermidine                | 24 | 80 |
| putrescine                | 5  | 17 |
| histamine                 | 14 | 47 |
| methyl-lysine             | 2  | 7  |
| choline                   | 20 | 67 |
| creatinine                | 11 | 37 |
| ornithine                 | 26 | 87 |
| b-alanine                 | 3  | 10 |
| lysine                    | 26 | 87 |
| niacinamide               | 1  | 3  |
| adenine                   | 25 | 83 |
| arginine                  | 17 | 57 |
| GABA                      | 12 | 40 |
| histidine                 | 28 | 93 |
| 6-aminocaproic acid       | 19 | 63 |
| carnitine                 | 12 | 40 |
| guanine                   | 4  | 13 |
| epinephrine               | 4  | 13 |
| glycine                   | 7  | 23 |
| creatine                  | 21 | 70 |
| alanine-alanine           | 5  | 17 |
| adenosine                 | 22 | 73 |
| HEPES                     | 29 | 97 |
| alanine                   | 11 | 37 |
| sarcosine                 | 7  | 23 |
| valine                    | 20 | 67 |
| homoserine                | 7  | 23 |
| serine                    | 25 | 83 |
| leucine                   | 23 | 77 |
| isoleucine                | 15 | 50 |
| cystathionine             | 2  | 7  |
| niacin                    | 3  | 10 |
| asparagine                | 3  | 10 |
| tryptophan                | 14 | 47 |
| methionine                | 5  | 17 |
| glutamine                 | 13 | 43 |
| citrulline                | 15 | 50 |
| glutamate                 | 28 | 93 |
| phenylalanine             | 25 | 83 |
| tyrosine                  | 24 | 80 |
| hypoxanthine              | 7  | 23 |
| proline                   | 25 | 83 |
| dimethylglycine           | 2  | 7  |
| aspartic acid             | 22 | 73 |
| betaine                   | 9  | 30 |
| proline betaine           | 8  | 27 |
| cytidine 5' monophosphate | 1  | 3  |
| glutathione               | 11 | 37 |

Table showing the frequency of all identified metabolites detected from all cytoplasm samples presented in this study. The total number of cell cytoplasm samples was 30.
